# Supplementary material for: Formation of the icosahedral C60 fullerene via migration of single sp atoms and annihilation of sp-atom pairs
Source: Royal Society of Chemistry journal article supplement (doi:10.1039/d4cp02490g), 2024-01-01
Supplement: d4cp02490g1.pdf [file d4cp02490g1.pdf]

## Supplementary Information for

### Formation of icosahedral C<sub>60</sub> fullerene via migration of single sp atoms and annihilation of sp-atom pairs

*Alexander S. Sinitsa<sup>a,b</sup>, Yulia G. Polynskaya<sup>a</sup>, Yegor M. Kedalo<sup>a,b</sup>, Andrey A. Knizhnik<sup>a,b</sup> and Andrey M. Popov<sup>c</sup>*

<sup>a</sup> Kintech Lab Ltd., 3rd Khoroshevskaya Street 12, Moscow 123298, Russia;

<sup>b</sup> National Research Centre “Kurchatov Institute”, Kurchatov Square 1, Moscow 123182, Russia;

<sup>c</sup> Institute for Spectroscopy of Russian Academy of Sciences, Fizicheskaya Street 5, Troitsk, Moscow 108840, Russia.

#### Contents

**p. S2:** Table S1: Calculated total energies  $\Delta E$  (relative to the ground state position 1 with the minimal total energy), distances  $d$  between the two sp<sup>2</sup> atoms which are the nearest neighbors of the sp atom, and partition functions  $q$  for all 47 nonequivalent positions of the sp atom.

**p. S3:** Table S2: Calculated barriers for sp-atom migration.

**Calculated total energies  $\Delta E$  (relative to the ground state position 1 with the minimal total energy), distance  $d$  between the two  $sp^2$  atoms which are the nearest neighbors of the  $sp$  atom, and partition functions for all 47 nonequivalent positions of the  $sp$  atom.**

Table S1. Calculated energies (in eV, relative to the ground state position 1 with the minimal total energy), distances  $d$  (in Å) between the two  $sp^2$  atoms, which are the nearest neighbours of the  $sp$  atom, and partition functions  $q$  ( $\ln(q)$  is given) of the 47  $sp$ -atom positions in the  $C_{58}-C_{2v}$  fullerene isomer instead of or above a common bond of  $sp^2$ -structure rings consisting of  $n$  and  $m$  atoms (see Figure 1).  $N_s$  is the number of  $sp$ -atom migration steps from the  $sp$ -atom position 1. Values of distances where the bond exists between the two  $sp^2$  atoms which are the nearest neighbours of the  $sp$  atom are emphasized.

| Sp-atom position | $(n,m)$ | $N_s$ | $\Delta E$ , eV | $d$ , Å     | $\ln(q)$ |
|------------------|---------|-------|-----------------|-------------|----------|
| 1                | (5,7)   | 0     | 0.00            | 2.35        | 46.43    |
| 2                | (6,6)   | 2     | 0.96            | 2.38        | 46.86    |
| 3                | (5,6)   | 1     | 1.19            | 2.28        | 46.66    |
| 4                | (5,6)   | 2     | 1.30            | 2.28        | 46.58    |
| 5                | (5,6)   | 3     | 1.35            | 2.25        | 46.64    |
| 6                | (5,7)   | 1     | 1.41            | 2.30        | 46.73    |
| 7                | (5,6)   | 3     | 1.41            | 2.22        | 46.66    |
| 8                | (5,6)   | 4     | 1.42            | 2.23        | 46.59    |
| 9                | (5,5)   | 1     | 1.58            | 2.21        | 46.59    |
| 10               | (5,6)   | 3     | 1.68            | 2.25        | 46.67    |
| 11               | (6,7)   | 1     | 1.70            | 2.35        | 47.13    |
| 12               | (6,6)   | 3     | 1.73            | 2.25        | 46.93    |
| 13               | (5,6)   | 4     | 1.76            | 2.22        | 46.72    |
| 14               | (5,6)   | 4     | 1.82            | 2.21        | 46.66    |
| 15               | (6,6)   | 4     | 1.82            | 2.34        | 47.14    |
| 16               | (5,6)   | 2     | 1.84            | <u>1.65</u> | 46.71    |
| 17               | (5,6)   | 3     | 1.84            | <u>1.65</u> | 46.71    |
| 18               | (5,6)   | 5     | 1.89            | 2.23        | 46.72    |
| 19               | (5,6)   | 2     | 1.94            | 2.19        | 46.71    |
| 20               | (5,5)   | 2     | 1.96            | 2.13        | 46.64    |
| 21               | (5,6)   | 5     | 1.96            | 2.24        | 46.76    |
| 22               | (5,6)   | 6     | 2.00            | 2.18        | 46.70    |
| 23               | (5,6)   | 6     | 2.00            | 2.22        | 46.66    |
| 24               | (5,6)   | 5     | 2.02            | 2.21        | 46.69    |
| 25               | (5,6)   | 7     | 2.02            | 2.20        | 46.68    |
| 26               | (5,6)   | 6     | 2.03            | 2.23        | 46.72    |
| 27               | (5,6)   | 5     | 2.04            | 2.21        | 46.69    |
| 28               | (5,6)   | 4     | 2.04            | 2.23        | 46.77    |
| 29               | (5,6)   | 7     | 2.06            | 2.20        | 46.69    |
| 30               | (5,6)   | 5     | 2.06            | 2.20        | 46.72    |

|    |       |   |      |             |       |
|----|-------|---|------|-------------|-------|
| 31 | (5,6) | 4 | 2.07 | 2.18        | 46.72 |
| 32 | (5,6) | 7 | 2.07 | 2.20        | 46.71 |
| 33 | (5,6) | 2 | 2.13 | 2.02        | 47.02 |
| 34 | (5,6) | 8 | 2.15 | 2.21        | 46.73 |
| 35 | (6,6) | 5 | 2.17 | 2.11        | 46.93 |
| 36 | (5,6) | 7 | 2.20 | 2.11        | 46.89 |
| 37 | (6,6) | 3 | 2.23 | 2.35        | 46.79 |
| 38 | (6,6) | 6 | 2.26 | <u>1.57</u> | 47.15 |
| 39 | (6,6) | 4 | 2.26 | <u>1.64</u> | 46.95 |
| 40 | (5,6) | 5 | 2.27 | 2.20        | 46.99 |
| 41 | (6,6) | 5 | 2.30 | <u>1.63</u> | 46.95 |
| 42 | (6,6) | 6 | 2.32 | <u>1.61</u> | 47.13 |
| 43 | (6,6) | 6 | 2.37 | <u>1.58</u> | 47.02 |
| 44 | (6,6) | 9 | 2.38 | <u>1.61</u> | 47.07 |
| 45 | (5,6) | 4 | 2.48 | 2.10        | 46.91 |
| 46 | (6,7) | 2 | 2.50 | 2.28        | 47.01 |
| 47 | (6,6) | 3 | 2.65 | 2.05        | 47.07 |

### Calculated barriers for sp-atom migration.

Table S2. Calculated barriers  $E_m$  (in eV) for sp-atom migration from position  $k$  to position  $l$  (see Figure 1).

| $k \rightarrow l$   | $E_m$ , eV      |
|---------------------|-----------------|
| 31 $\rightarrow$ 10 | 1.99            |
| 10 $\rightarrow$ 2  | 1.95            |
| 2 $\rightarrow$ 11  | 2.23            |
| 11 $\rightarrow$ 1  | 1.34            |
| 7 $\rightarrow$ 20  | 1.75            |
| 20 $\rightarrow$ 3  | 0.97            |
| 3 $\rightarrow$ 1   | 1.77            |
| 11 $\rightarrow$ 3  | 1.20            |
| average             | $1.65 \pm 0.13$ |
